# Supplementary material for: Development of Biotinylated Liposomes Encapsulating Metformin for Therapeutic Targeting of Inflammation-Based Diseases
Source: MDPI journal article supplement (doi:10.3390/pharmaceutics16020235), 2024-02-05
Supplement: s1 [file s1]

## Supplementary Materials

**Table S1.** Analysis of variance performed to compare the drug loading values of F1a-MH, F1b-MH and F1c-MH formulations.

### ANALYSIS OF VARIANCE

| Source   | Type III SS | df | Mean Squares | F-ratio | p value |
|----------|-------------|----|--------------|---------|---------|
| VAR\$(1) | 6.585       | 2  | 3.293        | 68.354  | 0.000   |
| Error    | 0.434       | 9  | 0.048        |         |         |

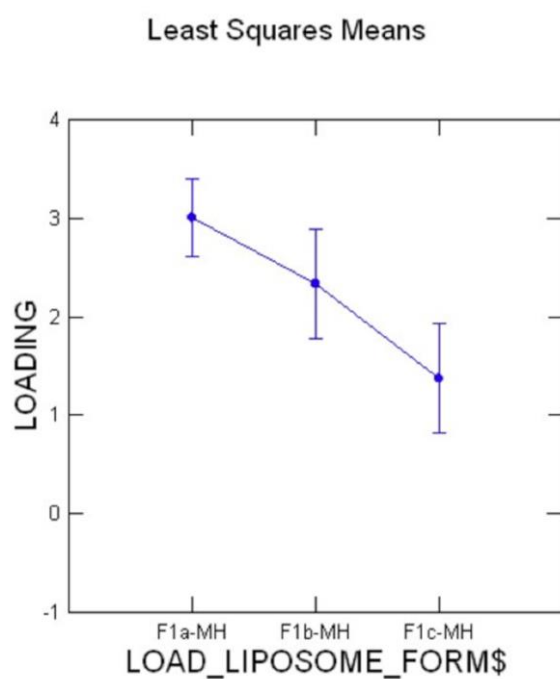

**Figure S1.** Drug loading values of the three MH-loaded liposomal formulations, in a graphical representation.

**Table S2.** *Post-hoc* analyses results deriving from the Tukey's (A), Bonferroni (B) and Fisher's (C) tests, applied to the ANOVA performed on the drug loading data.

| <b>A Tukey's Honestly-Significant-Difference Test</b> |             |            |         |                         |       |
|-------------------------------------------------------|-------------|------------|---------|-------------------------|-------|
| VAR\$(1)(i)                                           | VAR\$(1)(j) | Difference | p-Value | 95% Confidence Interval |       |
|                                                       |             |            |         | Lower                   | Upper |
| F1a metf                                              | F1b metf    | 0,671      | 0,005   | 0,238                   | 1,105 |
| F1a metf                                              | F1c metf    | 1,796      | 0,000   | 1,362                   | 2,229 |
| F1b metf                                              | F1c metf    | 1,124      | 0,000   | 0,691                   | 1,558 |

  

| <b>B Bonferroni Test</b> |             |            |         |                         |       |
|--------------------------|-------------|------------|---------|-------------------------|-------|
| VAR\$(1)(i)              | VAR\$(1)(j) | Difference | p-Value | 95% Confidence Interval |       |
|                          |             |            |         | Lower                   | Upper |
| F1a metf                 | F1b metf    | 0,671      | 0,006   | 0,216                   | 1,126 |
| F1a metf                 | F1c metf    | 1,796      | 0,000   | 1,340                   | 2,251 |
| F1b metf                 | F1c metf    | 1,124      | 0,000   | 0,669                   | 1,580 |

  

| <b>C Fisher's Least-Significant-Difference Test</b> |             |            |         |                         |       |
|-----------------------------------------------------|-------------|------------|---------|-------------------------|-------|
| VAR\$(1)(i)                                         | VAR\$(1)(j) | Difference | p-Value | 95% Confidence Interval |       |
|                                                     |             |            |         | Lower                   | Upper |
| F1a metf                                            | F1b metf    | 0,671      | 0,002   | 0,320                   | 1,022 |
| F1a metf                                            | F1c metf    | 1,796      | 0,000   | 1,445                   | 2,147 |
| F1b metf                                            | F1c metf    | 1,124      | 0,000   | 0,773                   | 1,476 |

**Table S3.** Analysis of variance comparing the mean hydrodynamic diameter of unloaded and MH-loaded F1 formulations.

**ANALYSIS OF VARIANCE**

| Source          | Type III SS | df | Mean Squares | F-ratio | p value |
|-----------------|-------------|----|--------------|---------|---------|
| LIPOSOME_FORM\$ | 1172,595    | 3  | 390,865      | 4,765   | 0,021   |
| Error           | 984,339     | 12 | 82,028       |         |         |

**Table S4.** *Post-hoc* analyses results deriving from the Tukey's (A), Bonferroni (B) and Fisher's (C) tests, applied to the ANOVA performed on the mean size data of unloaded and MH-loaded F1 liposomes.

**A**

| Tukey's Honestly-Significant-Difference Test |                    |            |         |                         |        |
|----------------------------------------------|--------------------|------------|---------|-------------------------|--------|
| LIPOSOME_FORM\$(i)                           | LIPOSOME_FORM\$(j) | Difference | p-Value | 95% Confidence Interval |        |
|                                              |                    |            |         | Lower                   | Upper  |
| F1                                           | F1a-MH             | 4,817      | 0,842   | -12,540                 | 22,174 |
| F1                                           | F1b-MH             | 6,733      | 0,767   | -13,804                 | 27,270 |
| F1                                           | F1c-MH             | -17,300    | 0,110   | -37,837                 | 3,237  |
| F1a-MH                                       | F1b-MH             | 1,917      | 0,990   | -17,097                 | 20,930 |
| F1a-MH                                       | F1c-MH             | -22,117    | 0,021   | -41,130                 | -3,103 |
| F1b-MH                                       | F1c-MH             | -24,033    | 0,031   | -45,988                 | -2,078 |

**B**

| Bonferroni Test    |                    |            |         |                         |        |
|--------------------|--------------------|------------|---------|-------------------------|--------|
| LIPOSOME_FORM\$(i) | LIPOSOME_FORM\$(j) | Difference | p-Value | 95% Confidence Interval |        |
|                    |                    |            |         | Lower                   | Upper  |
| F1                 | F1a-MH             | 4,817      | 1,000   | -13,615                 | 23,248 |
| F1                 | F1b-MH             | 6,733      | 1,000   | -15,075                 | 28,542 |
| F1                 | F1c-MH             | -17,300    | 0,167   | -39,108                 | 4,508  |
| F1a-MH             | F1b-MH             | 1,917      | 1,000   | -18,274                 | 22,107 |
| F1a-MH             | F1c-MH             | -22,117    | 0,029   | -42,307                 | -1,926 |
| F1b-MH             | F1c-MH             | -24,033    | 0,042   | -47,347                 | -0,719 |

**C**

| Fisher's Least-Significant-Difference Test |                    |            |         |                         |        |
|--------------------------------------------|--------------------|------------|---------|-------------------------|--------|
| LIPOSOME_FORM\$(i)                         | LIPOSOME_FORM\$(j) | Difference | p-Value | 95% Confidence Interval |        |
|                                            |                    |            |         | Lower                   | Upper  |
| F1                                         | F1a-MH             | 4,817      | 0,426   | -7,921                  | 17,555 |
| F1                                         | F1b-MH             | 6,733      | 0,350   | -8,338                  | 21,805 |
| F1                                         | F1c-MH             | -17,300    | 0,028   | -32,372                 | -2,228 |
| F1a-MH                                     | F1b-MH             | 1,917      | 0,770   | -12,037                 | 15,870 |
| F1a-MH                                     | F1c-MH             | -22,117    | 0,005   | -36,070                 | -8,163 |
| F1b-MH                                     | F1c-MH             | -24,033    | 0,007   | -40,146                 | -7,921 |

**Figure S2.** Mean size values of unloaded and MH-loaded F1 liposomes.

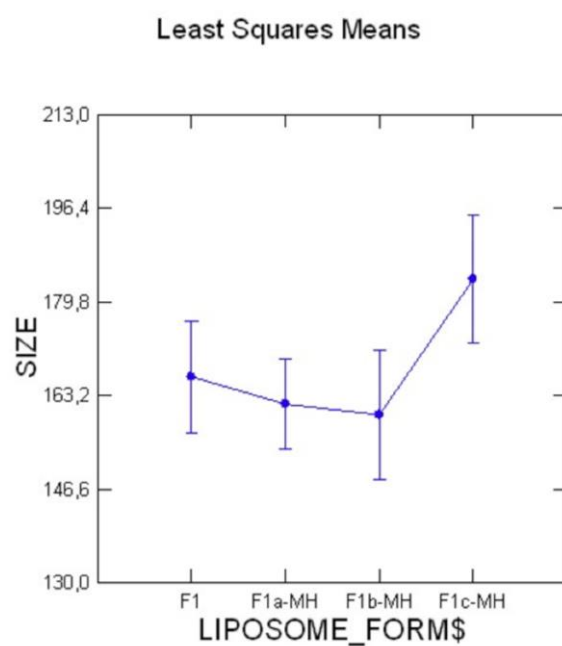

**Table S5.** Analysis of variance performed to compare the mean zeta potential values of unloaded and MH-loaded F1 formulations.

**ANALYSIS OF VARIANCE**

| Source        | Type III SS | df | Mean Squares | F-ratio | p value |
|---------------|-------------|----|--------------|---------|---------|
| LIPOSOME_FZ\$ | 26,583      | 3  | 8,861        | 2,817   | 0,094   |
| Error         | 31,460      | 10 | 3,146        |         |         |

**Table S6.** *Post-hoc* analyses results deriving from the Tukey's (A), Bonferroni (B) and Fisher's (C) tests, applied to the ANOVA performed on the mean zeta potential values of unloaded and MH-loaded F1 liposomes.

| <b>A Tukey's Honestly-Significant-Difference Test</b> |                  |            |         |                         |       |
|-------------------------------------------------------|------------------|------------|---------|-------------------------|-------|
| LIPOSOME_FZ\$(i)                                      | LIPOSOME_FZ\$(j) | Difference | p-Value | 95% Confidence Interval |       |
|                                                       |                  |            |         | Lower                   | Upper |
| F1                                                    | F1a-MH           | 0,994      | 0,867   | -2,968                  | 4,957 |
| F1                                                    | F1b-MH           | -2,672     | 0,229   | -6,635                  | 1,291 |
| F1                                                    | F1c-MH           | -1,839     | 0,516   | -5,802                  | 2,124 |
| F1a-MH                                                | F1b-MH           | -3,667     | 0,114   | -8,097                  | 0,764 |
| F1a-MH                                                | F1c-MH           | -2,833     | 0,266   | -7,264                  | 1,597 |
| F1b-MH                                                | F1c-MH           | 0,833      | 0,937   | -3,597                  | 5,264 |

  

| <b>B Bonferroni Test</b> |                  |            |         |                         |       |
|--------------------------|------------------|------------|---------|-------------------------|-------|
| LIPOSOME_FZ\$(i)         | LIPOSOME_FZ\$(j) | Difference | p-Value | 95% Confidence Interval |       |
|                          |                  |            |         | Lower                   | Upper |
| F1                       | F1a-MH           | 0,994      | 1,000   | -3,250                  | 5,239 |
| F1                       | F1b-MH           | -2,672     | 0,396   | -6,917                  | 1,572 |
| F1                       | F1c-MH           | -1,839     | 1,000   | -6,083                  | 2,406 |
| F1a-MH                   | F1b-MH           | -3,667     | 0,179   | -8,412                  | 1,079 |
| F1a-MH                   | F1c-MH           | -2,833     | 0,473   | -7,579                  | 1,912 |
| F1b-MH                   | F1c-MH           | 0,833      | 1,000   | -3,912                  | 5,579 |

  

| <b>C Fisher's Least-Significant-Difference Test</b> |                  |            |         |                         |        |
|-----------------------------------------------------|------------------|------------|---------|-------------------------|--------|
| LIPOSOME_FZ\$(i)                                    | LIPOSOME_FZ\$(j) | Difference | p-Value | 95% Confidence Interval |        |
|                                                     |                  |            |         | Lower                   | Upper  |
| F1                                                  | F1a-MH           | 0,994      | 0,460   | -1,892                  | 3,881  |
| F1                                                  | F1b-MH           | -2,672     | 0,066   | -5,558                  | 0,214  |
| F1                                                  | F1c-MH           | -1,839     | 0,186   | -4,725                  | 1,047  |
| F1a-MH                                              | F1b-MH           | -3,667     | 0,030   | -6,894                  | -0,440 |
| F1a-MH                                              | F1c-MH           | -2,833     | 0,079   | -6,060                  | 0,394  |
| F1b-MH                                              | F1c-MH           | 0,833      | 0,578   | -2,394                  | 4,060  |

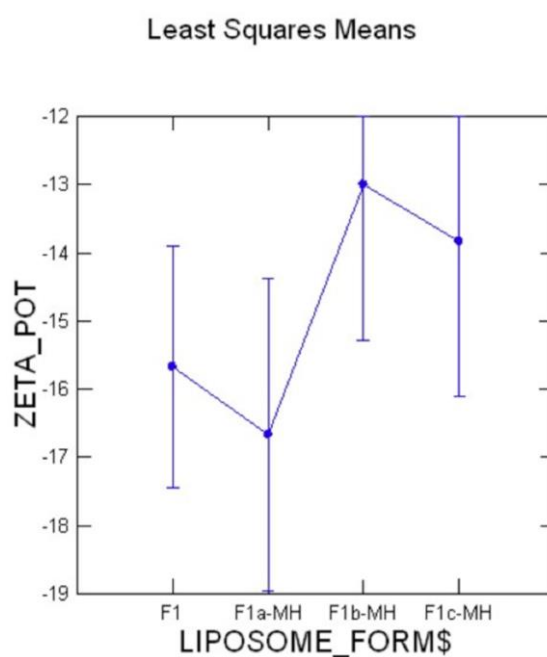

**Figure S3.** Mean zeta potential values of unloaded and MH-loaded F1 liposomes.
